# Supplementary material for: Novel class of Bi(iii) hydroxamato complexes: synthesis, urease inhibitory activity and activity against H. pylori
Source: Royal Society of Chemistry journal article supplement (doi:10.1039/c5dt05061h), 2016-01-01
Supplement: c5dt05061h1.pdf [file c5dt05061h1.pdf]

## Electronic Supplementary Information

Novel class of Bi(III) hydroxamato complexes: synthesis, urease inhibitory activity and activity against  
*H. pylori*

D. M. Keogan, B. Twamley, D. Fitzgerald Hughes and D. M. Griffith

### Contents:

- Table 1 Crystallographic data for 1 and 2.
- Table 2. Coordination Geometry around Bi centres for 1 and 2.
- Fig S1. Structure of 1 showing both disordered (A, 50; B, 50%) moieties with full atom labelling.
- Fig. S2 Packing diagram of 1 (major moiety only) viewed down the a-axis. Disordered MeOH solvent included. Hydrogen atoms omitted for clarity.
- Fig. S3 Coordination geometry in 1 with atom labelling.
- Fig. S4 Packing diagram of 2b viewed down the a-axis. Hydrogen atoms omitted for clarity. Dashed lines indicate strong hydrogen bonding.
- Fig. S5 Coordination geometry in 2b with atom labelling.
- Fig. S6  $^1\text{H}$  NMR spectrum of complex 1.
- Fig. S7  $^{13}\text{C}$  NMR spectrum of complex 1.
- Fig. S8 FTIR spectrum of complex 1.
- Fig. S9 ESI Mass Spectrum of Complex 1.

**Table 1 Crystallographic data for 1 and 2.**

|                                   | <b>1</b>                                                                       | <b>2</b>                                                                         |
|-----------------------------------|--------------------------------------------------------------------------------|----------------------------------------------------------------------------------|
| Empirical formula                 | C <sub>29</sub> H <sub>28</sub> Bi <sub>2</sub> N <sub>6</sub> O <sub>15</sub> | C <sub>90</sub> H <sub>108</sub> Bi <sub>6</sub> N <sub>18</sub> O <sub>66</sub> |
| Formula weight                    | 1118.53                                                                        | 3751.82                                                                          |
| Temperature                       | 100(2) K                                                                       | 100(2) K                                                                         |
| Wavelength                        | 0.71073 Å                                                                      | 0.71073 Å                                                                        |
| Crystal system                    | Triclinic                                                                      | Triclinic                                                                        |
| Space group                       | P $\bar{1}$                                                                    | P $\bar{1}$                                                                      |
| Unit cell dimensions              | a = 4.8467(4) Å                                                                | a = 15.0432(6) Å                                                                 |
| $\alpha$ = 112.5660(10)°.         |                                                                                |                                                                                  |
|                                   | b = 13.1798(12) Å                                                              | b = 15.2366(5) Å                                                                 |
| $\beta$ = 116.5850(10)°.          |                                                                                |                                                                                  |
|                                   | c = 15.0042(14) Å                                                              | c = 16.5434(6) Å                                                                 |
| $\gamma$ = 94.4850(10)°.          |                                                                                |                                                                                  |
| Volume                            | 913.72(14) Å <sup>3</sup>                                                      | 2984.48(19) Å <sup>3</sup>                                                       |
| Z                                 | 1                                                                              | 1                                                                                |
| Density (calculated)              | 2.033 Mg/m <sup>3</sup>                                                        | 2.087 Mg/m <sup>3</sup>                                                          |
| Absorption coefficient            | 9.692 mm <sup>-1</sup>                                                         | 8.926 mm <sup>-1</sup>                                                           |
| F(000)                            | 530                                                                            | 1800                                                                             |
| Crystal size                      | 0.210 x 0.050 x<br>0.030 mm <sup>3</sup>                                       | 0.150 x 0.080 x 0.050<br>mm <sup>3</sup>                                         |
| Theta range for data collection   | 1.412 to 27.534°.                                                              | 1.518 to 30.135°.                                                                |
| Index ranges                      | -6 ≤ h ≤ 6, -17 ≤ k ≤ 17, -<br>19 ≤ l ≤ 19                                     | -21 ≤ h ≤ 21, -21 ≤ k ≤ 21, -<br>23 ≤ l ≤ 23                                     |
| Reflections collected             | 32284                                                                          | 111802                                                                           |
| Independent reflections           | 4213 [R(int) =<br>0.0626]                                                      | 17529 [R(int) = 0.0443]                                                          |
| Completeness to theta = 25.242°   | 100.0 %                                                                        | 100.0 %                                                                          |
| Absorption correction             | Semi-empirical from<br>equivalents                                             | Numerical                                                                        |
| Max. and min. transmission        | 0.7456 and 0.4625                                                              | 0.7837 and 0.4747                                                                |
| Refinement method                 | Full-matrix least-<br>squares on F <sup>2</sup>                                | Full-matrix least-<br>squares on F <sup>2</sup>                                  |
| Data / restraints / parameters    | 4213 / 94 / 251                                                                | 17529 / 14 / 827                                                                 |
| Goodness-of-fit on F <sup>2</sup> | 1.084                                                                          | 1.004                                                                            |
| Final R indices [I > 2σ(I)]       | R1 = 0.0371, wR2 =<br>0.0904                                                   | R1 = 0.0254, wR2 =<br>0.0489                                                     |

|                             |                                       |                                    |
|-----------------------------|---------------------------------------|------------------------------------|
| R indices (all data)        | R1 = 0.0437, wR2 =<br>0.0935          | R1 = 0.0411, wR2 =<br>0.0533       |
| Largest diff. peak and hole | 2.302 and -1.477<br>e.Å <sup>-3</sup> | 1.894 and -1.451 e.Å <sup>-3</sup> |

**Table 2. Coordination Geometry around Bi centres for 1 and 2.**

| Bond                   | Distance (Å) | Bond    | Distance (Å) | Bond                   | Distance (Å) |
|------------------------|--------------|---------|--------------|------------------------|--------------|
| <b>1</b>               |              |         |              |                        |              |
| Bi1-O1                 | 2.201(5)     |         |              |                        |              |
| Bi1-O11                | 2.234(4)     |         |              |                        |              |
| Bi1-O14                | 2.276(5)     |         |              |                        |              |
| Bi1-O4                 | 2.409(5)     |         |              |                        |              |
| Bi1-O19                | 2.519(5)     |         |              |                        |              |
| Bi1-O11 <sup>\$1</sup> | 2.674(5)     |         |              |                        |              |
| Bi1-O22                | 2.755(5)     |         |              |                        |              |
| Bi1-O1 <sup>\$2</sup>  | 3.034(5)     |         |              |                        |              |
| <b>2</b>               |              |         |              |                        |              |
| Bi1-O10                | 2.256(2)     | Bi2-O5  | 2.604(3)     | Bi3-O2                 | 2.515(3)     |
| Bi1-O11                | 2.327(2)     | Bi2-O6  | 2.509(3)     | Bi3-O3                 | 2.893(4)     |
| Bi1-O14                | 2.773(3)     | Bi2-O32 | 2.230(2)     | Bi3-O10 <sup>\$3</sup> | 2.721(2)     |
| Bi1-O21                | 2.337(2)     | Bi2-O33 | 2.277(2)     | Bi3-O21 <sup>\$3</sup> | 3.201(3)     |
| Bi1-O21 <sup>\$3</sup> | 2.577(2)     | Bi2-O43 | 2.459(2)     | Bi3-O43                | 2.427(2)     |
| Bi1-O22                | 2.269(2)     | Bi2-O44 | 2.312(3)     | Bi3-O54                | 2.329(2)     |
| Bi1-O32                | 2.521(2)     | Bi2-O54 | 2.639(2)     | Bi3-O55                | 2.378(3)     |
| Bi1-O43                | 2.829(2)     | Bi2-O65 | 2.822(2)     | Bi3-O65                | 2.226(2)     |
| Bi1-O54                | 3.158(2)     |         |              | Bi3-O66                | 2.380(2)     |

Symmetry transformations used to generate equivalent atoms: \$1 = -x+1,-y+1,-z; \$2 = 1+x, y, z; \$3 = -x+1,-y+1,-z+1

A

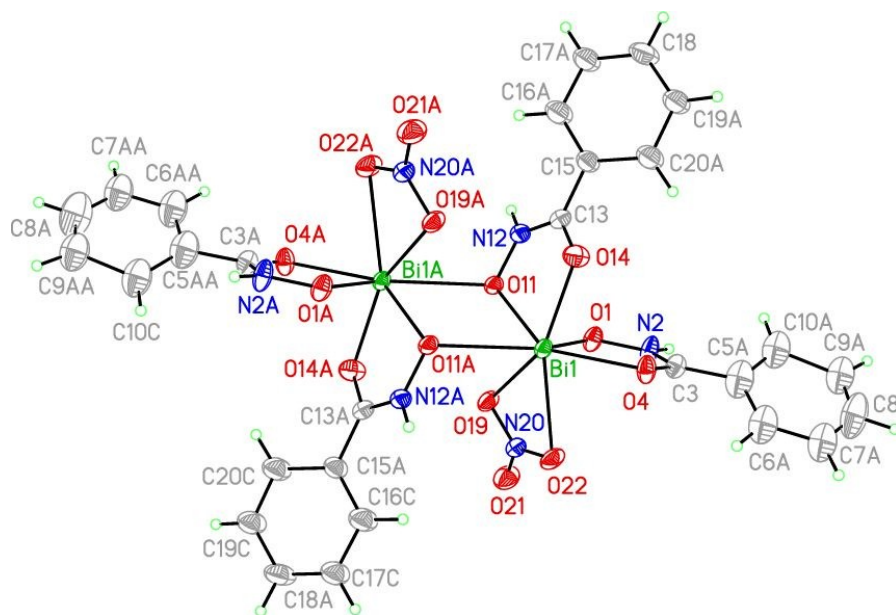

B

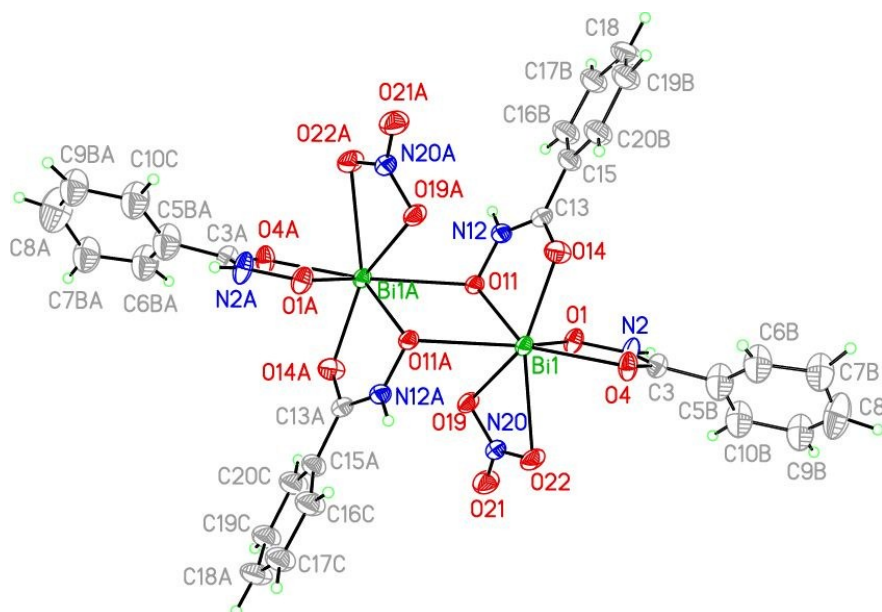

**Fig S1.** Structure of 1 showing both disordered (A, 50; B, 50%) moieties with full atom labelling.

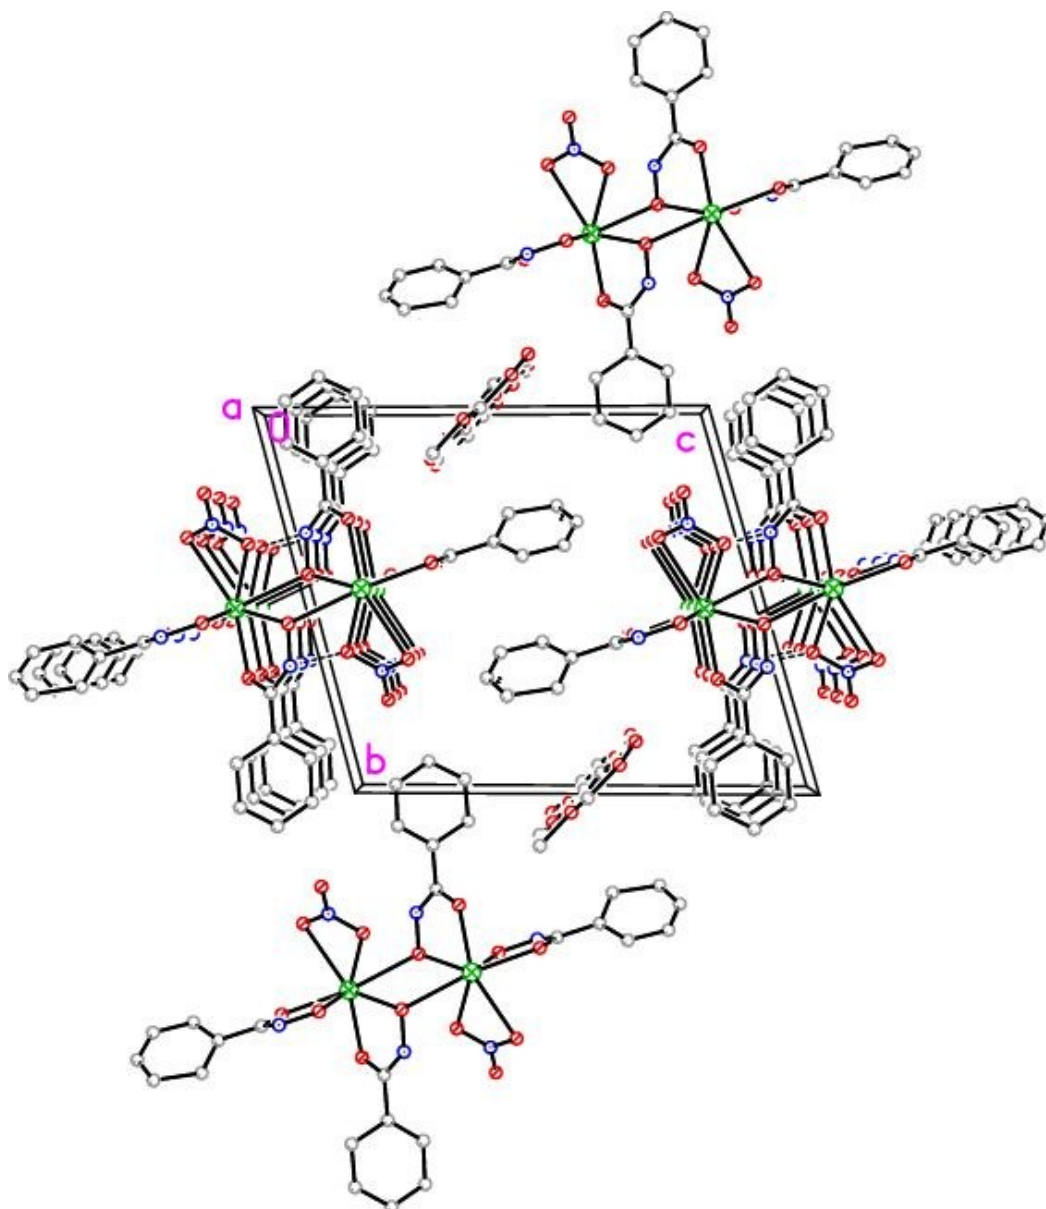

**Fig. S2 Packing diagram of 1 (major moiety only) viewed down the a-axis. Disordered MeOH solvent included. Hydrogen atoms omitted for clarity.**

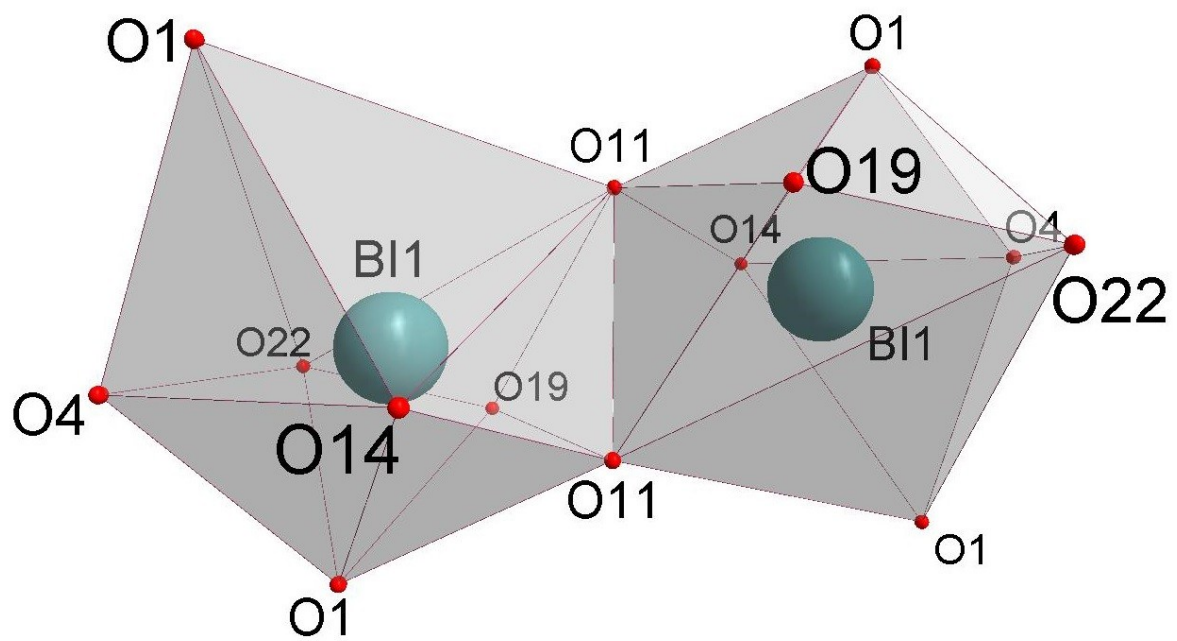

Fig. S3 Coordination geometry in 1 with atom labelling.

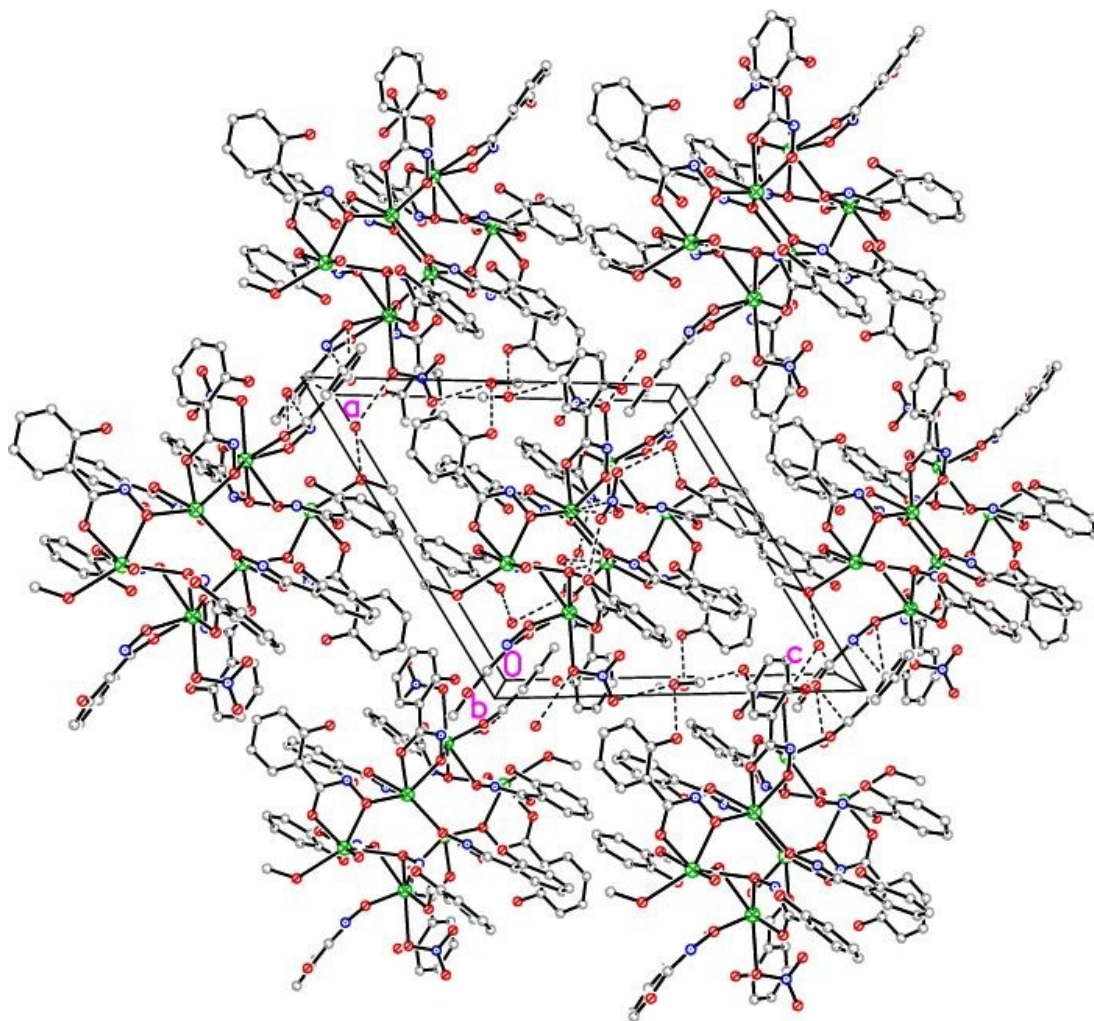

**Fig. S4** Packing diagram of 2 viewed down the a-axis. Hydrogen atoms omitted for clarity. Dashed lines indicate strong hydrogen bonding.

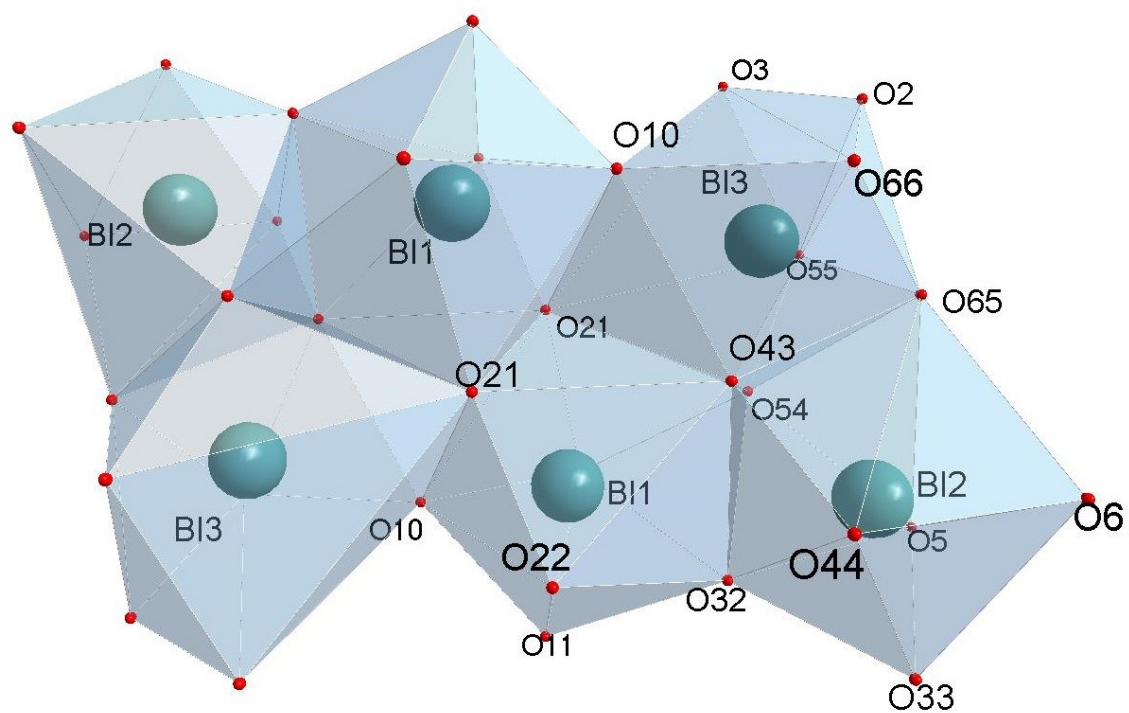

Fig. S5. Coordination geometry in 2 with atom labelling.



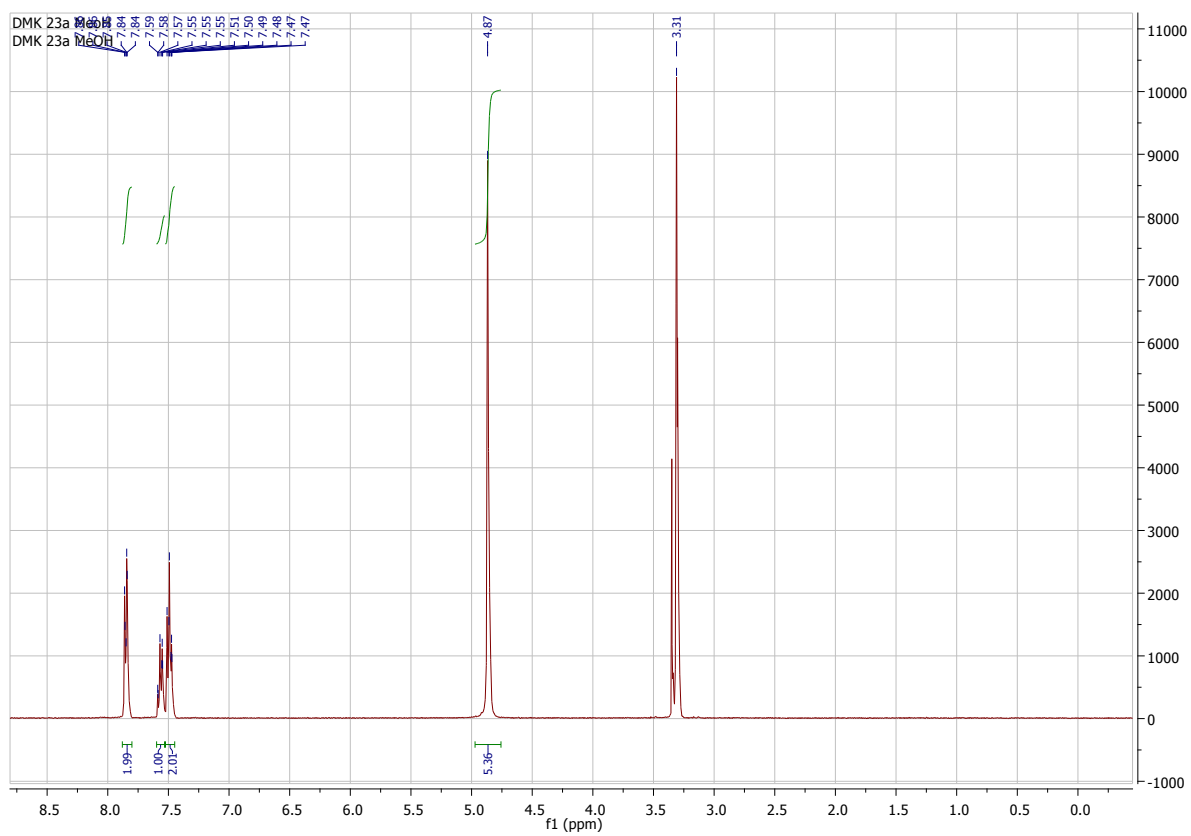

Fig. S6  $^1\text{H}$  NMR spectrum of complex 1.

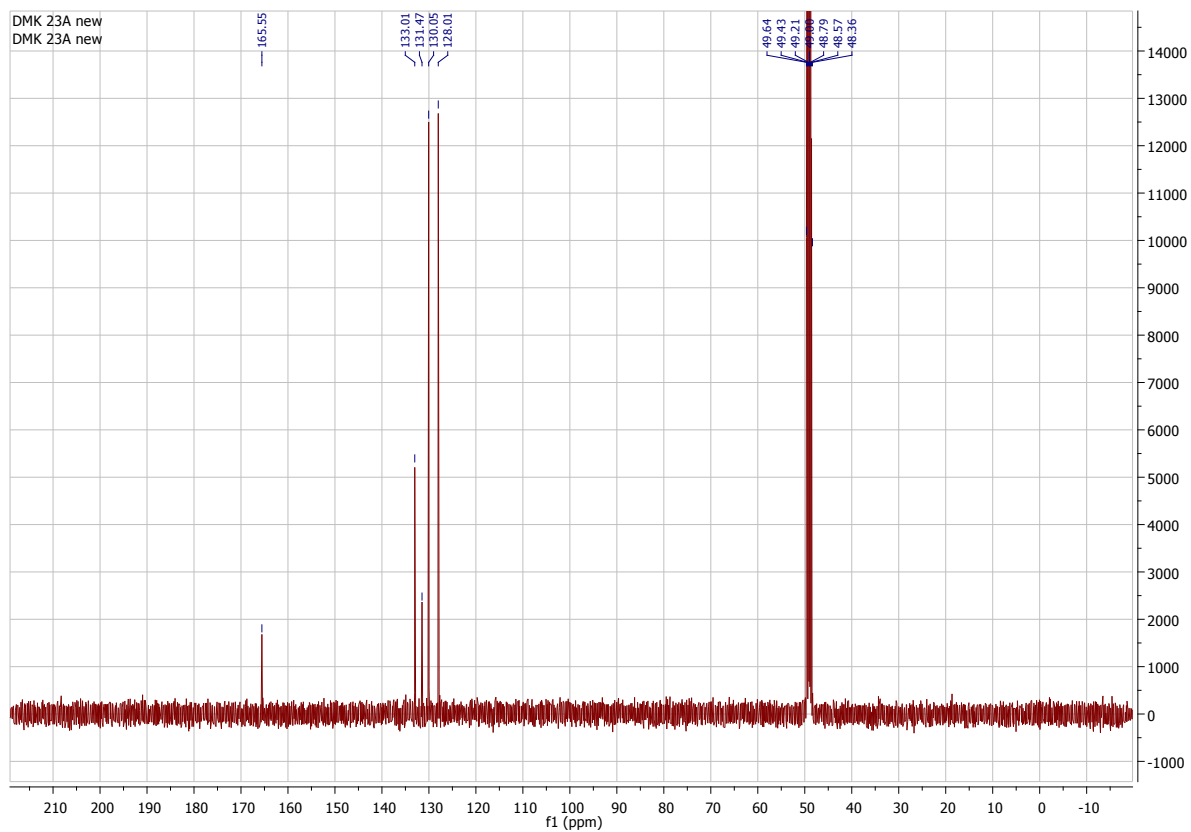

Fig. S7  $^{13}\text{C}$  NMR spectrum of complex 1.

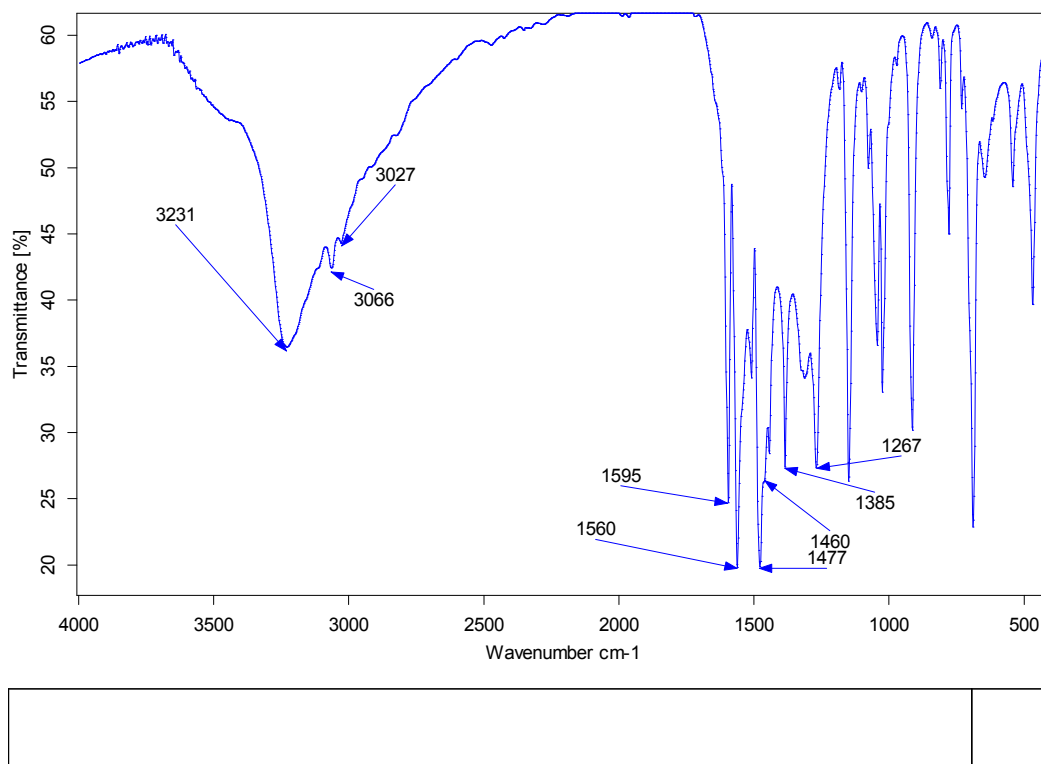

**Fig. S8 FTIR spectrum of complex 1.**

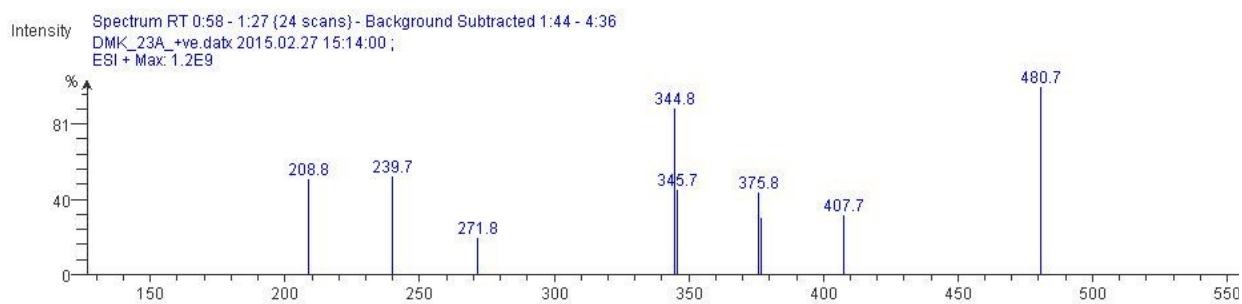

**Fig. S9 ESI Mass Spectrum of Complex 1.**
